1 **Increasing the resolution of malaria early warning systems for use by local health**  
2 **actors**

3

4 Michelle V Evans<sup>1,2,3\*</sup>, Felana A Ihantamalala<sup>2,3</sup>, Mauricianot Randriamihaja<sup>1,2</sup>, Vincent  
5 Herbreteau<sup>4</sup>, Christophe Révillion<sup>4,5</sup>, Thibault Catry<sup>4</sup>, Eric Delaitre<sup>4</sup>, Matthew H Bonds<sup>2,3</sup>,  
6 Benjamin Roche<sup>1</sup>, Ezra Mitsinjoniala<sup>2</sup>, Fiainamirindra A Ralaivavikoa<sup>2</sup>, Bénédicte  
7 Razafinjato<sup>2</sup>, Oméga Raobela<sup>6</sup>, Andres Garchitorena<sup>1,2</sup>

8

9 1. MIVEGEC, Univ. Montpellier, CNRS, IRD, Montpellier, France

10 2. NGO Pivot, Ranomafana, Ifanadiana, Madagascar

11 3. Department of Global Health and Social Medicine, Blavatnik Institute at Harvard Medical  
12 School, Boston, MA, USA

13 4. Espace-Dev, IRD, Univ Montpellier, Univ Antilles, Univ Guyane, Univ Réunion, Univ  
14 Nouvelle-Calédonie, Montpellier, France

15 5. Espace-Dev, Univ La Réunion, Saint Denis, La Réunion, France

16 6. National Malaria Program, Ministry of Health, Antananarivo, Madagascar

17

18 \*Corresponding author: [mv.evans.phd@gmail.com](mailto:mv.evans.phd@gmail.com)

19 **ABSTRACT**

20 **Background:** The increasing availability of electronic health system data and remotely-  
21 sensed environmental variables has led to the emergence of statistical models capable of  
22 producing malaria forecasts. Many of these models have been operationalized into malaria  
23 early warning systems (MEWSs), which provide predictions of malaria dynamics several  
24 months in advance at national and regional levels. However, MEWSs do not generally  
25 produce predictions at the village-level, the operational scale of community health systems  
26 and the first point of contact for the majority of rural populations in malaria-endemic  
27 countries.

28 **Methods:** We developed a hyper-local MEWS for use within a health-system strengthening  
29 intervention in rural Madagascar. It combined bias-corrected, village-level case notification  
30 data with remotely sensed environmental variables at spatial scales as fine as a 10m  
31 resolution. A spatio-temporal hierarchical generalized linear regression model was trained on  
32 monthly malaria case data from 195 communities from 2017-2020 and evaluated via cross-  
33 validation. The model was then integrated into an automated workflow with environmental  
34 data updated monthly to create a continuously updating MEWS capable of predicting malaria  
35 cases up to three months in advance at the village-level. Predictions were transformed into  
36 indicators relevant to health system actors by estimating the quantities of medical supplies  
37 required at each health clinic and the number of cases remaining untreated at the  
38 community level.

39 **Results:** The statistical model was able to accurately reproduce village-level case data,  
40 performing nearly five times as well as a null model during cross-validation. The dynamic  
41 environmental variables, particularly those associated with standing water and rice field  
42 dynamics, were strongly associated with malaria incidence, allowing the model to accurately  
43 predict future incidence rates. When compared to historical stock data, the MEWS predicted  
44 stock requirements within 50 units of reported stock requirements 68% of the time.

45 **Conclusion:** We demonstrate the feasibility of developing an automatic, hyper-local MEWS  
46 leveraging remotely-sensed environmental data at fine spatial scales. As health system data  
47 become increasingly digitized, this method can be easily applied to other regions and be  
48 updated with near real-time health data to further increase performance.

49

50 **Key words:** malaria; disease forecasting; climate; digital health; precision public health

51

## 52 BACKGROUND

53 Data systems play a key role in malaria control initiatives. Indeed, malaria surveillance is one  
54 of three pillars of the World Health Organization's (WHO) Global Technical Strategy for  
55 Malaria 2016-2030 (World Health Organization 2021). The strategy stresses the need to  
56 strengthen local health management information systems (HMISs) to better track progress  
57 towards elimination and heterogeneity within a country. In addition to surveillance, malaria  
58 early warning systems (MEWSs), which use statistical and mathematical models to forecast  
59 malaria dynamics up to several months in advance as a function of environmental variables,  
60 can aid health systems in preventing malaria outbreaks and improving system reactivity  
61 (Zinszer et al. 2012, Hemingway et al. 2016). Relevant environmental variables, such as  
62 temperature, precipitation, and vegetation indices, can be derived from satellite imagery,  
63 whose resolution, frequency, and accessibility are continuously improving (Wimberly et al.  
64 2021). With the evolving capabilities of health and environmental data systems, it is  
65 increasingly feasible to link these two data systems and create disease forecasts. However,  
66 while several MEWSs have been developed at global, regional, and national scales, the  
67 routine integration of environmental data in MEWSs remains rare (Hussain-Alkhateeb et al.  
68 2021).

69 The spatial scale at which MEWSs are developed determines the potential users of  
70 the tool for decision-making. While current MEWSs can effectively inform international  
71 organizations and national program managers, few MEWSs have been developed at local  
72 scales (< 1km<sup>2</sup>) relevant for operational use by health actors implementing malaria control  
73 activities within a health district. Increasing the resolution of MEWSs could allow district  
74 managers and medical teams to adapt interventions to the village or local level, such as  
75 hotspot targeting, last mile delivery, and community health worker (CHW) programs. Malaria  
76 hotspots (zones with consistently high incidence rates) have been proposed as an  
77 appropriate unit to target with vector control or human health interventions such as mass  
78 drug administration (Bousema et al. 2012), although the ability of these interventions to  
79 impact regions outside of hotspots is limited (Bousema et al. 2016, Stresman et al. 2019).  
80 Last mile delivery interventions support the management and distribution of medical stocks  
81 such as antimalarials and bed nets at the lowest scale of the health system, often the CHW  
82 or even households delivered door-to-door (USAID 2023). By delivering medical products  
83 and services to remote populations, these programs aim to remove geographic barriers to  
84 prevention and treatment of malaria within a medically-relevant timeframe. CHW programs  
85 provide basic maternal and child care within local communities of several hundred to several  
86 thousand people (Perry 2020). CHWs traditionally diagnose and treat malaria in children  
87 under 5 years of age, and recent pilot programs have demonstrated the success of  
88 expanding responsibilities to include novel malaria interventions, such as the provision of

89 intermittent preventive treatment to pregnant women (Pons-Duran et al. 2021) or proactive  
90 screening and treatment (Ratovoson et al. 2022). These successes of community-targeted  
91 programs have prompted calls for the increased development of digital health tools for  
92 programs implemented at local scales, especially in sub-Saharan Africa (Holst et al. 2020,  
93 Owoyemi et al. 2022).

94 In order for a MEWS to be usable by programs at the local-scale, it must not only  
95 provide predictions at a relevant spatial scale, but it should also demonstrate low latency and  
96 contextual relevance. This presents challenges as HMIS data are rarely reported at the scale  
97 of individual villages or communities, and when they are, tend to suffer from substantial data  
98 quality issues and biases (Noor et al. 2003, Ohrt et al. 2015, Garchitorena et al. 2021). In  
99 addition, the predictive variables used in the MEWS statistical model must also be at finer  
100 spatial scales than typically available, necessitating the pre- and post-processing of satellite  
101 imagery in continuous time (Wimberly et al. 2022). Finally, outputs of a MEWS should be  
102 made contextually relevant by integrating predictions with existing HMIS data, such as  
103 historical case burdens, information on diagnostic and treatment supplies, and ongoing  
104 programs. In consideration of these challenges, we developed SMALLER ('Surveillance and  
105 control of Malaria At the Local Level using E-health platfoRms'), a hyper-local MEWS  
106 specifically for use in the context of a health-system strengthening intervention in a rural  
107 district of Madagascar.

108

## 109 **METHODS**

110 We collected HMIS data and socio-environmental variables at the spatial scale of community  
111 health catchments, ensuring data quality by treating HMIS data with a zero-adjusted, gravity  
112 model estimator (Evans et al. 2023) and correcting satellite imagery with multiple treatment  
113 and gap filling processes, allowing us to retain the original scales of the data. We paired  
114 these data sources with a geographic information system of all the residential areas and rice  
115 fields in the district collected via a participatory mapping project (Ihantamalala et al. 2020),  
116 allowing us to extract data in zones where malaria transmission is likely occurring.  
117 Geostatistical models were trained using a Bayesian framework that allowed for spatio-  
118 temporal random effect structures to leverage information across community health  
119 catchments. Finally, we integrated the full workflow into a web application architecture that  
120 updates predictions continuously and provides information to local health actors in formats  
121 directly applicable to decision-making processes within the district (Fig. 1).

122

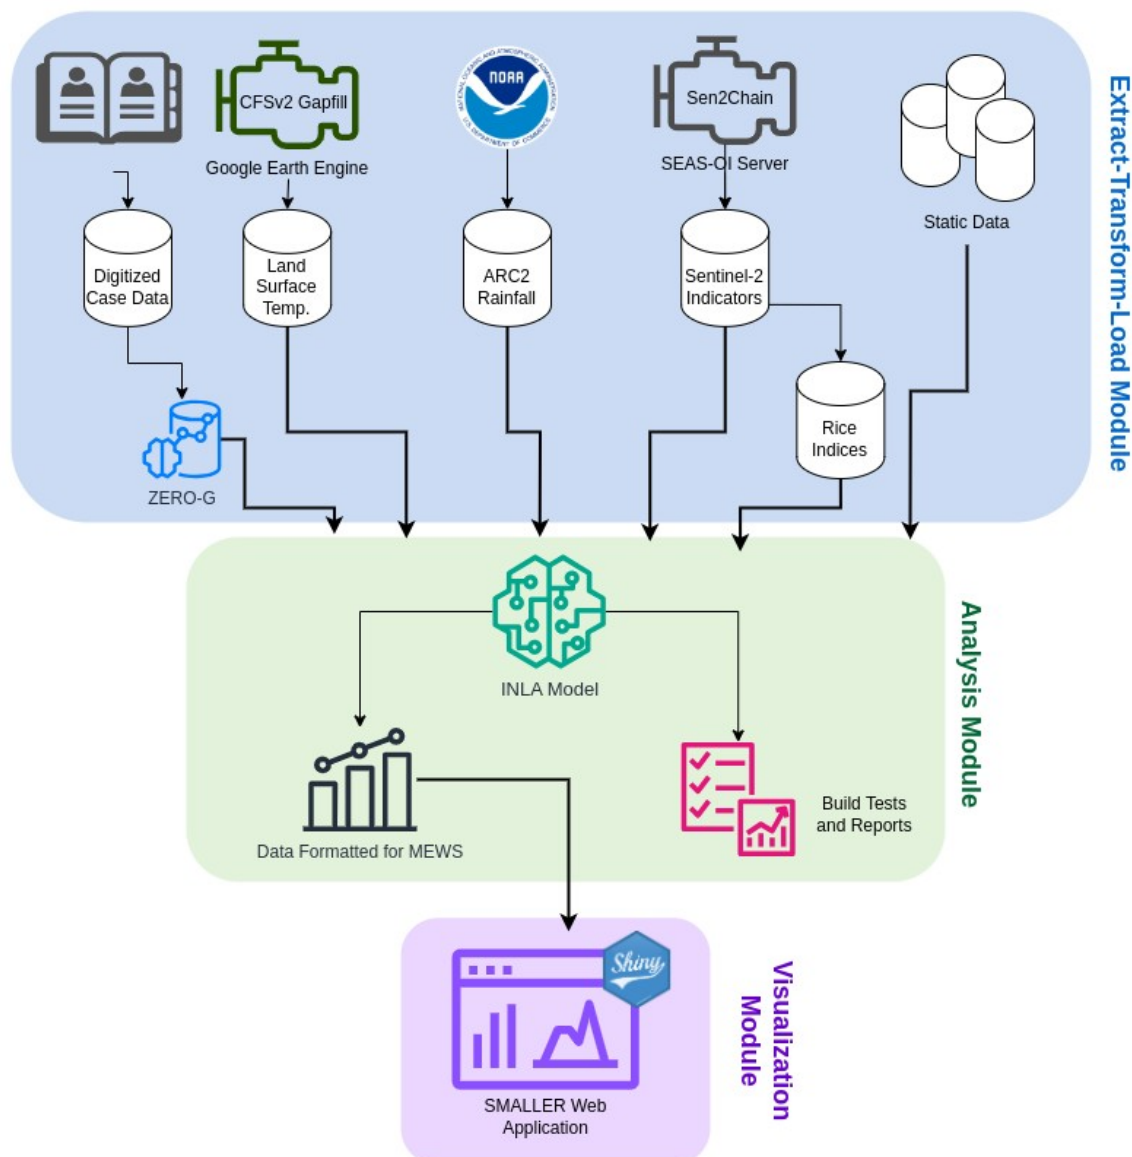

123

124 **Figure 1. Schema of SMALLER MEWS web application architecture.** The workflow is  
125 divided into three modules: Extract-Transform-Load, Analysis, and Visualization. The full  
126 workflow is updated on a monthly basis via a semi-automated process using the targets  
127 package.

128

### 129 **Study Area**

130 Madagascar is one of the few countries that has seen an increase in malaria burdens since  
131 the beginning of global elimination efforts in the early 2000s (Howes et al. 2016) The  
132 southeastern part of Madagascar experiences unimodal seasonal cycles of malaria (Nguyen  
133 et al. 2020), with overall higher prevalence rates than the central plateau regions  
134 (Ihantamalala et al. 2018, Arambepola et al. 2020, Rice et al. 2021). Ifanadiana is a rural  
135 health district located in the Vatovavy region of southeastern Madagascar. The district's

136 population is approximately 200,000 people, the majority of whom live in rural, isolated  
137 villages over 1 hour from a health center (Ihantamalala et al. 2020). The district is divided  
138 into 15 communes and 195 fokontany (the smallest administrative unit comprising one or  
139 several villages amounting to about 1000 individuals, which represents the community health  
140 catchment). Each commune contains at least one major primary health center (PHC), and  
141 six of the larger communes contain a second, basic primary health center that do not have  
142 medical doctors and provide more limited services (Fig. S4.1). Beginning in 2014, Ifanadiana  
143 has benefitted from a health system strengthening (HSS) intervention at all levels of the  
144 health system, from community health to the regional hospital, via a partnership between the  
145 Madagascar Ministry of Public Health (MMoPH) and the non-governmental organization  
146 Pivot (Cordier et al. 2020).

147 Ifanadiana contains a variety of ecoregions, including a protected tropical rainforest  
148 in the west and warmer, humid zones near the eastern coast. There is an east-west  
149 elevational gradient from an altitude of 1400m in the west to 100m in the east. The dominant  
150 land covers are savanna and agricultural land for rice production. This diversity of  
151 ecoregions and climates translates into spatio-temporal heterogeneities in malaria burden in  
152 the district (Hyde et al. 2021, Pourtois et al. 2023).

153

## 154 **Data Collection**

### 155 *Health Data*

156 The monthly number of malaria cases per community were collected from consultation  
157 registries at all primary health centers (PHCs) across the district, from January 2017-  
158 December 2020. Handwritten registries from each PHC were digitized, with each de-  
159 identified patient geolocated to the precision of a fokontany. The number of malaria cases,  
160 as confirmed by rapid diagnostic test (RDT), were aggregated by month for children under 5  
161 years old, children aged 5 - 14, and adults aged 15 years and above. Because these data  
162 are collected at PHCs, they are passive surveillance data and contain primarily symptomatic  
163 cases. These raw data were adjusted for underascertainment due to spatial bias in  
164 healthcare access using the ZERO-G method (Evans et al. 2023), which accounts for  
165 whether the PHC fell within the initial Pivot service catchment, whether point-of-care user  
166 fees had been removed for the PHC, the number of staff at the PHC, the level of the  
167 services, and the distance from the PHC to the district office. We also included additional  
168 identifiers of false-zeros based on the geographic coverage of the HSS intervention (see  
169 Supplemental Materials for more details). The ZERO-G method was applied separately to  
170 each age class. The final data used in the model were the ZERO-G adjusted monthly case  
171 counts, aggregated across all ages.

172 Information on historical quantities of malaria diagnostics and treatment were used to



173 validate model predictions and provide additional context for decision makers in the web  
174 application. These data were provided by the MMoPH at the monthly level for all major PHC  
175 in the district beginning in 2017 and are updated continuously. This includes the number of  
176 febrile patients seen at the facility, the number of febrile patients tested via RDT, the number  
177 of malaria positive RDTs, and the number of RDT-positive patients treated with Artemisinin-  
178 based combination treatments (ACTs).

179

### 180 *Environmental Indicators*

181 The surrounding environment can greatly influence the ecology of *Anopheles* mosquitoes,  
182 and therefore malaria dynamics themselves. We therefore collected data that described  
183 environmental dynamics, such as landcover, hydrology, and vegetation from the zones  
184 surrounding residential areas. We located major residential zones using a comprehensive  
185 dataset of the district of Ifanadiana collected via participatory mapping and available on  
186 OpenStreetMap (Ihantamalala et al. 2020). This dataset includes over 25,000 km of roads,  
187 tracks, and footpaths, 20,000 rice fields, 5000 residential areas, and 100,000 buildings. The  
188 dataset used for this study was accessed on Nov 30 2021. From this dataset, we identified  
189 the four primary villages of each fokontany, determined by the number of buildings and field-  
190 based knowledge of communities. These zones contained on average 40% of buildings in a  
191 fokontany and 60% of all buildings within residential zones, with the remaining buildings  
192 usually standalone structures such as small houses or shelters used during the agriculture  
193 season, rather than residences. We focused on the environment within 1 km of these  
194 residential zones, assuming that mosquito's flight distances were limited, following previous  
195 work in this region (Arisco et al. 2020). In addition, we identified the four largest rice fields in  
196 close proximity to these villages, creating a dataset of potential larval habitat closest to  
197 human settlements. This resulted in a total of 775 primary villages with a 1 km buffer and  
198 769 major rice fields that were used to extract environmental variables (Fig. 2).

199

200

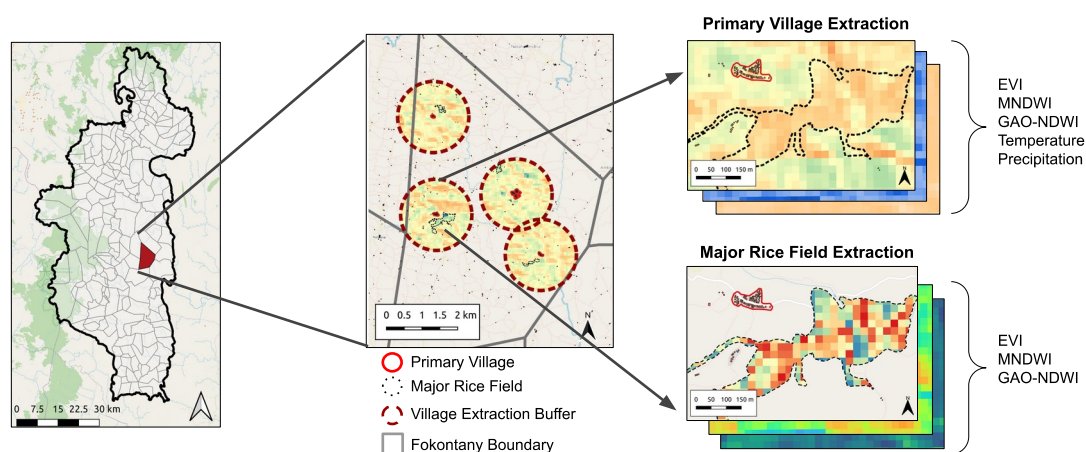

201 **Figure 2. Process of extracting environmental indicators at a fine-scale from satellite**  
202 **imagery for major village and rice field extraction zones.** Indicators at the primary village  
203 level are extracted using a 1km buffer surrounding the village (red-dashed line), while  
204 indicators at the rice field level are extracted within the boundaries of the major rice fields  
205 (black dashed line).

206

207 Landcover variables were calculated from a dataset derived from OpenStreetMap and  
208 Sentinel-2 satellite imagery, as described in Evans et al. (2021). This dataset classified  
209 landcover into residential, rice field, savanna, forest, and open water at a 10m resolution. We  
210 estimated the proportion of landcover that was a rice field within the 1 km buffer of the  
211 primary villages. We aggregated this value to the level of the fokontany by calculating a  
212 mean weighted by the population size of each primary village, multiplying the values by the  
213 proportion of the buildings in the residential area out of all buildings in all four residential  
214 areas (i.e. a building-weighted mean).

215 We derived two metrics representing spatial patterns in hydrology and standing water  
216 from the SRTM 30-m digital elevation model (DEM). Topographic wetness indices (TWIs)  
217 estimate predicted water accumulation as a function of an area's upstream catchment area  
218 and slope, and have been shown to predict malaria risk in regions with highly varied

219 topologies (Cohen et al. 2010, Platt et al. 2018). We estimated the TWI as  $\ln\left(\frac{a}{\tan(\beta)}\right)$ ,

220 where  $a$  is the surface catchment area of that pixel and  $\beta$  is the local surface topographic  
221 slope. We calculated the spatial mean of the TWI at each primary village and major rice field  
222 within a fokontany and calculated the mean TWI at the village and rice field levels within a  
223 fokontany by taking a building-weighted and standard mean, respectively. From the same  
224 DEM, we identified cells that served as sinks, or pixels with no outflow where water is likely  
225 to accumulate. We extracted the proportion of pixels that were sinks within a 1 km buffer of  
226 each primary village and used a building-weighted mean to calculate a fokontany-level  
227 value. All topographic analyses were done using GRASS GIS (GRASS Development Team  
228 2019) via the `rgrass` package in R (Bivand 2023).

229 Vegetation indices were derived from Sentinel-2 satellite imagery. These optical  
230 satellites have a revisit time of 5 days and a 10m spatial resolution. We used the Sen2Chain  
231 Python tool (Mouquet et al. 2020) to download and process the Sentinel-2 imagery to level  
232 L2A before calculating three radiometric indices: the Enhanced Vegetation Index (EVI)  
233 (Huete et al. 1997), the Modified Normalized Difference Water Index (MNDWI) (Xu 2006),  
234 and Gao's Normalized Difference Water Index (GAO-NDWI) (Gao 1996). Each of these  
235 indices represents different aspects of rice field land cover relevant for *Anopheles* habitat.  
236 EVI represents vegetation health and vigor, MNDWI identifies areas of open water, and  
237 NDWI-GAO estimates moisture in the vegetation. Images with greater than 25% cloud cover  
238 were removed and indices were extracted at the primary village 1km buffer and major rice



239 fields as described above (Fig. 2). Each extraction zone (e.g. primary village or major rice  
240 field) was less than 3 km<sup>2</sup> and therefore very susceptible to measurement error and random  
241 fluctuations. To reduce this stochastic noise and interpolate measurements for dates with  
242 high cloud cover, we smoothed the time series for each zone by applying a cubic-spline to  
243 the series, using leave-one-out cross-validation to select the optimal number of degrees of  
244 freedom. This cubic-spline was then used to predict values on a weekly frequency for each  
245 index. Monthly means were calculated from these weekly values for each fokontany as  
246 follows: village-level indicators were aggregated by the building-weighted mean described  
247 above, and rice field indicators were estimated as the mean value of all major rice fields in  
248 the fokontany. The final result was a monthly time series at the fokontany level for the three  
249 environmental indices at both the village and rice field zones.

250 We used principal component analysis to create indices of rice field dynamics from  
251 EVI, MNDWI, and GAO-NDWI extracted from rice fields zones. First, we estimated the  
252 difference in each index at the rice field level from the index extracted at a buffer of 1 km  
253 surrounding village zones ( $\Delta_{\text{vill-rice}}$ ) to categorize dynamics specific to rice field  
254 environments. Second, we transformed the indice extracted at rice fields (EVI, MNDWI, and  
255 GAO-NDWI) into seasonal anomalies by standardizing each index within each calendar  
256 month (e.g. January, February, etc.) following Kaul et al. (2018). This seasonal anomaly  
257 represents how conditions differed in that year compared to the same calendar month over  
258 the long-term dataset. Third, we included the original three environmental indices extracted  
259 at the major rice field zones. We used all three forms of the three indicators ( $\Delta_{\text{vill-rice}}$ ,  
260 seasonal anomalies, and original mean; 9 variables total) in the PCA, after having centered  
261 and scaled each one. We then selected the first three components, which contained over  
262 74% of the overall variance, to represent three indices of rice field dynamics (Table S1.1,  
263 Table S1.2, Table S1.3). Rice Index 1 was strongly influenced by all three forms of the  
264 MNDWI indicator, and was positively associated with the amount of standing water in rice  
265 fields, representing wetter periods. Rice Index 2 was more strongly associated with EVI and  
266 NDWI-GAO and represented the vegetation dynamics of the rice fields, with higher values  
267 associated with greener vegetation in rice fields compared to the surrounding village. Rice  
268 Index 3 was most strongly associated with anomalies in the vegetation indices and  
269 represented anomalies in vegetation phenology (specifically increased vegetation) and the  
270 timing of the agricultural season.

271

## 272 *Climate Data*

273 Meteorological stations are rare in Madagascar. Satellite-derived climate data at resolutions  
274 less than 5km are equally limited and, when present, suffer from cloud obstruction,  
275 particularly in the humid southeastern region. One solution is to aggregate data to a coarser

276 resolution or over multiple time periods, but this results in spatial scales too coarse to  
277 accurately represent hyper-local conditions. We considered this lack of fine-scale, accurate  
278 data in our choice of data sources and processing of both temperature and precipitation  
279 data. We estimated land surface temperature (LST) via a gap-filling algorithm that combines  
280 climatology from fine-scale MODIS imagery with modeled surface temperature from the  
281 Climate Forecast System Version 2 (CFSv2) to create daily estimates of LST at a 1 km  
282 resolution (Shiff et al. 2021). This method has been validated globally and performs well in  
283 this region of Madagascar, with a RMSE less than 2°C. We specifically used the MODIS  
284 Aqua Daily Land Surface Temperature, which was averaged to a monthly value after gap-  
285 filling. This represents an improvement in resolution over the 8km resolution corrected data  
286 available directly via MODIS at the monthly level. We obtained precipitation data from the  
287 NOAA Africa Rainfall Climatology v2 (ARC2) daily precipitation dataset via the `rnoaa`  
288 package in R (Chamberlain and Hocking 2023). We selected this dataset due to its high  
289 reported accuracy for this region of Madagascar (Ollivier et al. 2023). We summed the daily  
290 precipitation by month to obtain the total monthly precipitation for each 0.1 x 0.1 degree (~  
291 10 km) pixel. Both climate variables were extracted using a primary village 1km buffer and  
292 aggregated to the fokontany-level via a building-weighted mean, as described above.

293

#### 294 *Socio-demographic data*

295 Socio-demographic data were collected from 2014-2021 via the IHOPE cohort, a longitudinal  
296 survey based on the Demographic and Health Surveys, conducted in about 1600  
297 households of Ifanadiana district distributed across 80 spatial clusters (Miller et al. 2018).  
298 Briefly, a two-stage sampling design was used to sample 40 clusters at random with each of  
299 two strata, the initial HSS intervention catchment and the rest of the district. Twenty  
300 households per cluster were then randomly selected to be surveyed. Further details on the  
301 IHOPE longitudinal survey can be found in Miller et al. (2017, 2018). The IHOPE cohort  
302 collects information on household-level socio-demographic, health, and socio-economic  
303 indicators. We included data on household wealth scores in this study, extracted to the  
304 fokontany level following Evans et al. (2022).

305 In addition to household-level demographic data, we included variables representing  
306 the geography of each fokontany, specifically the distribution of houses and the distance to  
307 primary health centers. Residential areas are clustered within Ifanadiana district and a  
308 fokontany-wide estimate of building density does not accurately represent the population  
309 density experienced by an individual. We therefore calculated a relative building density by  
310 calculating the density of buildings within 100m of a building for all buildings within each  
311 fokontany. We calculated the median of this value to obtain fokontany-level estimates. The  
312 distance to a primary health center was estimated for each building over the full transport

313 network using the Open Source Routing Machine (OSRM) routing algorithm via the osrm  
314 package in R (Giraud 2022), and the average distance was calculated for each fokontany.  
315

### 316 *Health Intervention Data*

317 The study period intersected with a time of on-going health system interventions known to  
318 impact malaria dynamics. Over the past decade, Madagascar has conducted a mass long-  
319 lasting insecticide-treated bed net (LLIN) distribution every three years beginning in October  
320 2015. The effect of bed nets decreases over time due to waning bioefficacy and functional  
321 integrity (Ngonghala et al. 2014, Randriamaherijaona et al. 2017). We therefore included a  
322 variable in the model to represent this waning over time via the number of months since the  
323 most recent bed net distribution. From October 2019 thru December 2021, a pilot proactive  
324 community care intervention was implemented in one commune in the district, increasing  
325 treatment rates of malaria by nearly 40% (Razafinjato et al. 2024). We accounted for this  
326 heterogeneity in treatment rates caused by interventions by including a binary variable for  
327 months and fokontany when the proactive care intervention was in place. Finally, although  
328 the data were already adjusted for geographic bias in health-seeking behaviors via ZERO-G,  
329 an artifact of this bias remained. We therefore included the distance to the nearest PHC in  
330 the model, allowing for a non-linear relationship via a penalized smoothing spline.

331

### 332 **Statistical Model**

333 We implemented a Bayesian spatio-temporal model via an Integrated Nested  
334 Laplace Approximation (INLA) model that included hierarchical random effects (Rue et al.  
335 2009). Bayesian hierarchical models are particularly useful for analyzing spatio-temporal  
336 data because of their ability to leverage random effects across space and time to account for  
337 spatio-temporal correlation and more accurately estimate random effect coefficients when  
338 data are of low quality or missing. We accounted for the spatio-temporal covariance in our  
339 data in two ways. First, we included a cyclical temporal term by month of the year via a first  
340 order random walk, estimated for each commune. Second, we included spatial covariance  
341 by fokontany via the Besag, York, and Mollie spatial model (Besag et al. 1991, Morris et al.  
342 2019), which includes an unstructured random effect for each fokontany in addition to a  
343 Besag model for the spatial structure. Predictor variables were inspected for normality and  
344 log-transformed when necessary, then scaled and centered to aid with model convergence.  
345 Dynamic variables were lagged by 3 months to account for delays in the effect of  
346 environmental and climatic variables on malaria transmission and to allow for predicting  
347 malaria trends into the future. We conducted a supplementary analysis to explore including  
348 non-linear effects of predictor variables via penalized splines, but found that it performed  
349 similarly to a model including only linear effects while requiring a significantly longer

350 computation time (details reported in the Supplementary Materials). We therefore used the  
351 more parsimonious linear model. This resulted in a total of fourteen covariates in the model,  
352 six of which are lagged, dynamic variables updated monthly (Fig. S4.2, Table S5.1). The  
353 INLA model was fit to monthly case data at the fokontany level via a zero-inflated negative  
354 binomial distribution using a log-link, with population as an offset. The model was trained on  
355 the number of malaria cases per fokontany from January 2017 thru December 2020 and  
356 used to predict future disease incidence for the MEWS.

357 We performed out-of-sample prediction tests across both space and time to assess  
358 our model's predictive capabilities via leave-one-out cross-validation. Spatial out-of-sample  
359 assessment was done by commune, leaving one commune out of model training and  
360 predicting incidence in that commune, resulting in 15 separate tests. Temporal out-of-sample  
361 assessment was done by year, where each sample omitted from model training  
362 corresponded to a year of data from 2017-2020. We assessed the model's predictive ability  
363 via the IQR of the absolute error, which is more robust to outliers than the RMSE, and the  
364 Spearman's correlation coefficient ( $\rho$ ) between the predicted and observed incidence rates.

365 A motivation for the creation of this dashboard was the high frequency of disruptions  
366 to diagnostic and medical stocks ("stock-outs") observed in malaria-endemic regions of  
367 Madagascar, and the need for better guidance to plan future stock use. We therefore further  
368 validated the model retrospectively by comparing predicted ACT needs (i.e. predicted  
369 number of malaria cases expected to seek care) to reported ACT needs at each PHC (i.e.  
370 number of positive malaria cases requiring treatment). To do this, we first back-calculated  
371 the number of cases per fokontany expected to seek care at a PHC by rescaling the total  
372 number of cases per fokontany. We assumed a binomial probability of observation of each  
373 case at a PHC equal to the sampling intensity estimated via the ZERO-G method. The cases  
374 that did not seek care were assumed to remain at the community health catchment. We then  
375 predicted the proportion of cases attending each PHC from each fokontany based on the  
376 historical distribution of consultations from each fokontany to each PHC from 2018-2019. We  
377 chose this subset of the data in order to use the most recent and most complete consultation  
378 data that did not suffer from bias due to the COVID-19 pandemic which began in 2020.  
379 These numbers were then aggregated to the level of the PHC, providing the number of  
380 malaria cases predicted to seek care at each PHC, or the predicted ACT requirement. We  
381 validated this method of back-calculation by comparing predicted ACT requirements from the  
382 SMALLER MEWS to reported ACT requirements for 14 major PHCs from January 2017 -  
383 December 2020 by estimating the absolute error and Spearman's correlation coefficient  
384 between the two datasets.

385

## 386 **Automating the Workflow for a MEWS Web Application**

387 We automated the remote sensing and statistical model workflow for a MEWS web  
388 application via the `targets` package (Landau 2021), which creates a Make-like pipeline for  
389 R scripts. The use of a Make-like workflow is especially beneficial for deploying a MEWS in a  
390 resource-limited setting because only those data sources and tasks that are not up to date  
391 are rerun in the monthly update, conserving computational and network resources. The  
392 `targets` pipeline “backend” is linked to an R shiny “frontend”, which contains the web  
393 application user interface (Fig. 1). The workflow updates monthly, collecting new  
394 environmental variables and creating updated forecasts that are then available online for use  
395 by local health actors.

396 The `targets` pipeline contains the Extract-Transform-Load and Analysis modules of  
397 the application (Fig. 1). Static data are loaded into the project one time, pre-processed and  
398 formatted for the model. Dynamic data are then updated monthly on the tenth day of the  
399 month, to allow for latency in data collection, before being combined with the static data to  
400 use in prediction. We use a combination of tools to collect this data semi-automatically.  
401 Google Earth Engine scripts, which process temperature data, are manually run via the  
402 Online Code Platform, and processed data are added to the project, where they are tracked  
403 via the `targets` workflow. Sentinel-2 indices are updated monthly via the Sen2Chain tool  
404 implemented on servers hosted at SEAS-OI Station at Université de la Réunion, where the  
405 data are then provided through HTTP. The data source url is added to the `targets`  
406 workflow, which then observes the HTTP file for changes. If a change is made to the file, the  
407 new data are automatically included in the next update. Because the `targets` workflow  
408 tracks the downstream flow of data, when the raw index data are updated, all downstream  
409 features derived from this, such as the rice indices, are also updated. The workflow is semi-  
410 manual, in that the automatic pipeline is run under supervision, so that the input data and  
411 resulting predictions can be validated by a subject expert before being made publicly  
412 available. This is done via a `quarto` document that automatically renders after the workflow  
413 is completed, providing information on the environmental input data and output predictions.

414

## 415 **RESULTS**

### 416 ***Malaria Case Data***

417 In total, there were 107,739 reported malaria cases in Ifanadiana district from January 2017 -  
418 December 2020. Missingness of data (*i.e.*, registers not available) was 2.21%, or 207 of  
419 9360 total month by fokontany samples. After applying the ZERO-G method, which adjusts  
420 for underascertainment due to spatial bias in healthcare access, the estimated total number  
421 of symptomatic malaria cases was 377,211, with a median annual incidence per fokontany

422 of 357 cases per 1000 individuals (95% CI : 2.81 - 1699). The highest incidence was  
 423 observed between the months of November - April, ranging from 37.2 – 77.1 cases per 1000  
 424 individuals per month. The mean annual incidence was 1626 cases per 1000 in the 25% of  
 425 fokontany experiencing the highest incidence rates and 280 cases per 1000 in the 25% of  
 426 fokontany experiencing the lowest incidence rates.

427

#### 428 **Model Performance and Results**

429 The INLA model was able to accurately reproduce community-level malaria case data. When  
 430 applied to the full dataset, it achieved a median absolute error of 16.99 cases per 1000  
 431 individuals per month (IQR = 7.30 – 38.93), equivalent to 43% of the mean monthly adjusted  
 432 incidence rate. The predicted and observed incidence rates were significantly positively  
 433 correlated (Spearman's  $\rho = 0.647$ ,  $p$ -value  $< 0.0001$ ). Similarly, the model performed well  
 434 when assessed via cross-validation across space and time (Table 1). Predictive ability was  
 435 similar across communes, with the exception of one commune in the south of the district  
 436 (Fig. S4.3), where accuracy was much lower than in the other 14 communes. The model  
 437 performed well at predicting incidence in out-of-sample years. In particular, the full model  
 438 performed better on out-of-sample data in 2020 than on in-sample data, evidence of the  
 439 models' ability to forecast forward in time (Fig. S4.4).

440

|                                    | Temporal cross-validation<br>(by year) |                          | Spatial cross-validation<br>(by commune) |                          |
|------------------------------------|----------------------------------------|--------------------------|------------------------------------------|--------------------------|
|                                    | Null Model                             | Full Model               | Null Model                               | Full Model               |
| In-Sample<br>Median AE             | 36.23 (35.64 -<br>36.5)                | 15.93 (15.46 -<br>16.69) | 36.24 (35.22 -<br>37.82)                 | 15.93 (15.35 -<br>17.03) |
| Out-of-Sample<br>Median AE         | 36.26 (35.6 -<br>38.13)                | 15.91 (14.03 -<br>17.25) | 40.39 (22.75 -<br>67.25)                 | 18.55 (9.53 -<br>48.72)  |
| In-Sample<br>Spearman's $\rho$     | 0.10 (0.09 -<br>0.12)                  | 0.66 (0.63 -<br>0.69)    | 0.10 (0.07 -<br>0.13)                    | 0.66 (0.65 -<br>0.68)    |
| Out-of-Sample<br>Spearman's $\rho$ | 0.10 (0.05 -<br>0.13)                  | 0.66 (0.54 -<br>0.74)    | 0.05 (-0.12 -<br>0.27)                   | 0.67 (0.41 -<br>0.84)    |

441 **Table 1.** Performance metrics of the predictive model when assessed via leave-one-out  
 442 cross-validation across time and space. The null model corresponds to a model that only  
 443 estimates a district level mean without any covariates. Values are the mean performance  
 444 metrics with the range of metrics in parentheses. Median absolute error (AE) represents the  
 445 median absolute difference between model predictions and the true values, with lower



446 values representing better model performance. Spearman's  $\rho$  represents the correlation  
447 between the model predictions and the true values, with values closer to one representing  
448 better model performance.

449

450 SMALLER MEWS predicted stock requirements by combining predicted malaria  
451 incidence rates with estimated health-care seeking behaviors, which were compared with  
452 reported stock requirements. Reporting of historical stock requirements was incomplete, with  
453 12 of 14 PHCs missing the quantity of ACTs required (e.g. the number of positive RDTs)  
454 during at least one month. However, only 3 PHCs were missing more than 5 months of data  
455 over the 48 month period. The reported ACT requirement in the district ranged from 15,624  
456 to 38,154 annually, with needs increasing steadily over time from 2017 - 2020 (Fig. 3). In  
457 contrast, the predicted ACT requirement ranged from 20,736 to 28,399 per year over the  
458 same time period. The median absolute error between predicted and reported ACT  
459 requirements was 20 units (IQR = 9 - 70), equaling an error of approximately 20% of the  
460 mean number of monthly cases received at a PHC. However, the dataset of reported ACT  
461 requirements was strongly influenced by outliers. When assessed via a Spearman's  
462 correlation test, which is more robust to outliers, the predicted ACT requirements correlated  
463 strongly with the reported ACT requirements (Spearman's  $\rho = 0.849$ ,  $p$ -value<0.001). The  
464 SMALLER MEWS estimated the quantity of ACT required within 50 units of the reported  
465 requirement for 68% of the month and PHC samples. It did not show a strong bias for under-  
466 or over-estimation, overestimating the requirement for 44.2% of the samples and  
467 underestimating the requirement for 55.8% of the samples. Performance was dependent on  
468 the PHC, with the average annual difference in predicted vs. reported stock needs ranging  
469 from -73.36% to +15.25 % of the actual need across all 14 PHCs (Fig. 3). For all PHCs,  
470 there were months with very high reported ACT requirements that were underestimated by  
471 the SMALLER MEWS, particularly in 2020 (Fig. 3).

472

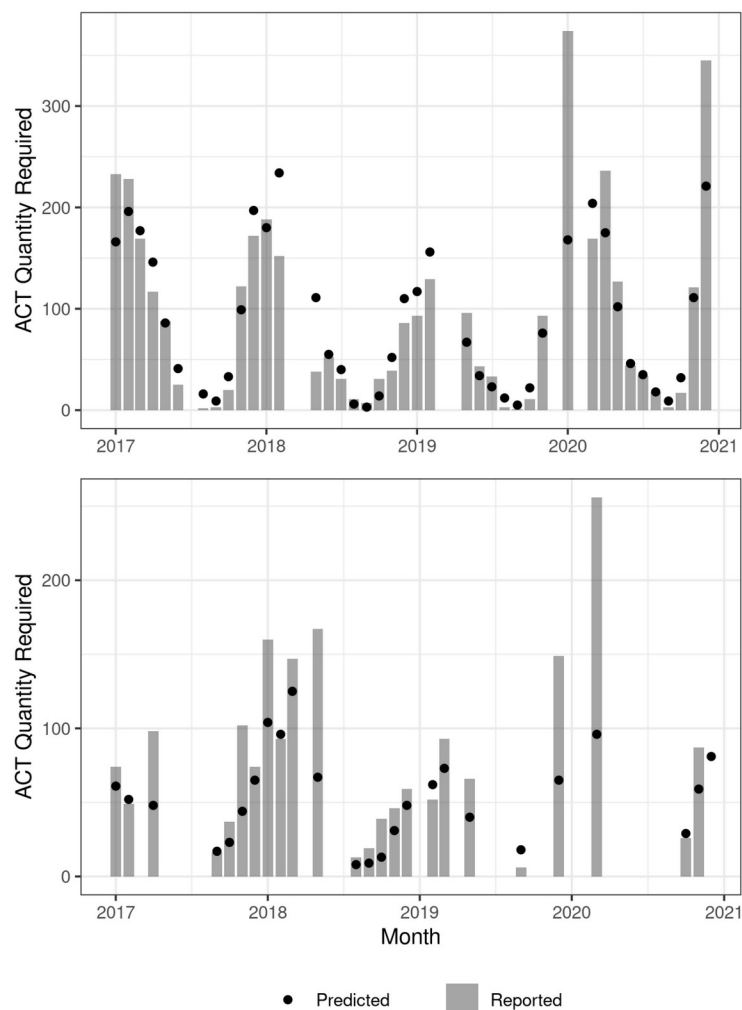

473

474 **Figure 3. The ability of the SMALLER MEWS to accurately reproduce historical ACT**  
475 **requirements differed by PHC.** This figure demonstrates two example PHCs where the  
476 SMALLER MEWS predicted the required ACT within 0.7% (top) and 51.2% (bottom) of the  
477 reported annual requirement. Months with missing reported ACT requirements are not  
478 plotted.

479

480 While the objective of this model was to predict future malaria cases based on  
481 established relationships with environmental variables, and not draw inference about these  
482 relationships, this does not preclude the exploration of these relationships established via  
483 the statistical model. We found that the time since the previous LLIN distribution was  
484 strongly associated with higher incidences of malaria (Fig. 4, Table S5.2). Fokontany with  
485 higher socio-economic levels tended to have a lower incidence of malaria (Fig. 4, Table  
486 S5.2). The majority of the 3-month lagged dynamic environmental variables were  
487 significantly associated with malaria incidence (Fig 4, Table S5.2). Malaria incidence was  
488 strongly associated with temperature and MNDWI at the village-level (Table S5.2, Fig. 4). It

489 was also associated with EVI at the village-level, rainfall, and Rice Indices 2 (vegetation  
490 dynamics) and 3 (seasonal anomalies), although these coefficients were smaller than for  
491 temperature and MNDWI (Table S5.2, Fig. 4).  
492

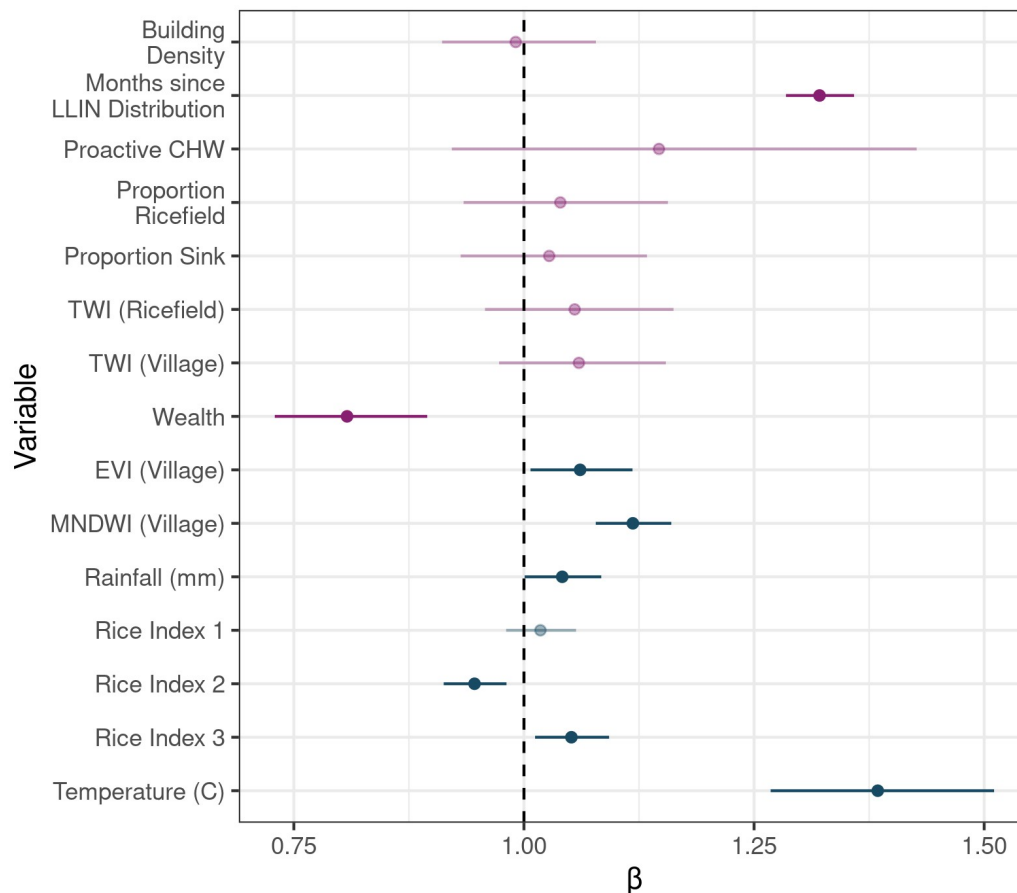

493  
494 **Figure 4. Model coefficients of the primary INLA model.** Static variables are colored in  
495 purple and dynamic variables, which are lagged by 3 months and updated monthly, are  
496 colored in blue. Points represent the median value of the coefficient and error bars the 95%  
497 confidence intervals (CI). Those points whose CI overlaps 1, and therefore do not exhibit a  
498 statistically significant relationship with malaria incidence, are represented in faded colors.  
499

#### 500 ***SMALLER MEWS Web Application***

501 We integrated the INLA model within the automated workflow to predict malaria incidence  
502 three months in advance for each fokontany. These predictions are accessible via a  
503 dashboard-style web application which provides hyper-local information relevant to program  
504 managers and personnel working across the health system in Ifanadiana district. The  
505 landing page of the application provides an overview of malaria burden across the district  
506 over the next three months (Fig. 5). This includes alert buttons displaying four key indicators  
507 for district health personnel: the total number of cases, the total incidence, the malaria

508 burden compared to the prior year, and the number of health clinics expected to receive  
509 more cases than the prior year. Also on this landing page is a map of the incidence in the  
510 district, displayed at the spatial scale of the community health catchment. Selecting a  
511 fokontany on this map opens a window which displays a time series of the forecasted  
512 malaria incidence, with historical time series included for context. These data can be  
513 explored further via a table that displays these values by month and fokontany. The table  
514 can be subset interactively and all of the data are available for download as a csv file.

515 One objective of this dashboard was to address health actors' concerns regarding  
516 disruptions to diagnostic and medical stocks. We therefore added modules to help inform the  
517 risk of stock disruptions for each major PHC and the expected number of cases requiring  
518 treatment at the community health catchment. The module displaying stockout risk for each  
519 PHC compares the predicted number of cases expected to seek care at a PHC with the  
520 historical ACT use over the past two years. We also estimated the number of malaria cases  
521 not captured by PHCs and remaining at the community health level, presented in a separate  
522 module. These cases could seek care at a community health site, be identified during  
523 proactive community health visits, or remain untreated. These functionalities are meant to  
524 provide granular information for district managers and health workers for context-specific  
525 decision-making.

526

527 [Figure removed because it contains text in French.]

528 **Figure 5. Screenshot of the landing page of the SMALLER MEWS web application.** The  
529 side panel serves to navigate between the pages of the site, including a page to download  
530 the data and explore predicted needs at the community and primary health center level. The  
531 web application can be accessed at <https://smaller.pivot-dashboard.org/>.

532

### 533 **DISCUSSION**

534 Advances in disease analytics and forecasting, coupled with the increased availability of  
535 timely health data and fine resolution remotely-sensed satellite information, promise a new  
536 era of precision public health which will allow the delivery of “the right intervention to the right  
537 population at the right time” (Khoury et al. 2016). Yet, there is currently an important gap  
538 between the spatio-temporal scales at which these tools are available, and the much finer  
539 scales necessary to inform local program implementation for improving disease surveillance  
540 and control. We developed a hyper-local malaria early warning system (MEWS), SMALLER,  
541 for use by a health system strengthening program serving a rural health district in  
542 southeastern Madagascar. SMALLER combines fine-resolution information on static  
543 hydrological and socio-demographics with fine-resolution dynamic data derived from satellite  
544 imagery and climate models that are updated on a monthly frequency. SMALLER forecasted

545 malaria incidence at the community scale (a village or group of villages) up to three months  
546 in advance, improving correlations with out-of-sample data by nearly 500% compared to a  
547 null model. When used to inform stock requirements, it predicted historical ACT  
548 requirements within 50 cases of the reported requirement over 68% of the time. Integrated  
549 into a web application, SMALLER provides real-time access for local health actors to the  
550 MEWS predictions to aid in context-specific decision making.

551 SMALLER contributes to a rapidly growing ecosystem of disease forecasting tools  
552 developed to aid in decision making. A recent review found that of the 37 existing tools used  
553 for the modeling of climate-sensitive infectious diseases, 16 of them focused exclusively on  
554 malaria (Ryan et al. 2023). The sensitivity of malaria to climate and environmental variables  
555 makes it an ideal candidate for disease forecasting efforts (Wimberly et al. 2021). Indeed, we  
556 found that ecological variables related to temperature and vegetation dynamics were  
557 strongly associated with malaria incidence, in agreement with past work (Arisco et al. 2020,  
558 Rakotoarison et al. 2020, Pourtois et al. 2023, Epstein et al. 2023). Interestingly, after  
559 accounting for seasonal dynamics via a cyclical temporal structure, MNDWI was more  
560 strongly associated with malaria incidence than precipitation. This variable was collected at a  
561 finer spatial resolution (10m vs. 10 km) that represented local standing water dynamics.  
562 Weather stations are rare across the African continent, resulting in downscaled gridded  
563 precipitation data of low-quality (Dinku et al. 2022). This suggests that indices derived from  
564 satellite imagery may be more useful than those from coarser precipitation models for  
565 malaria prediction at local scales in areas with poor weather station coverage.

566 A feature unique to the SMALLER MEWS is its ability to integrate disease forecasts  
567 with information on historical stock quantities and disruptions. The ability of stock-outs to  
568 hinder progress towards malaria elimination has been highlighted since the introduction of  
569 ACTs nearly fifteen years ago (Kangwana et al. 2009, The PLoS Medicine Editors 2009). A  
570 stock-out not only prevents an individual patient's treatment, but can increase healthcare  
571 costs when patients must seek treatment at private facilities (Mikkelsen-Lopez et al. 2013).  
572 Lower or delayed treatment rates can, in turn, allow for increased severity, onward  
573 transmission, and higher population-level prevalence rates (Challenger et al. 2019). A  
574 multinational study of eight sub-Saharan African countries found that, in contrast to the other  
575 seven countries in the region, Madagascar experienced a decrease in malaria diagnostic  
576 availability in public health facilities from 2010 to 2015 (Akulayi et al. 2017). Both RDTs and  
577 ACTs are delivered to public health facilities via a "pull system", where health facility  
578 managers manually fill in quarterly orders for medicines and supplies, which are delivered  
579 from the capital to district depots and eventually individual public facilities' pharmacies. Per  
580 national policy, the quantity requested is a function of the amount of materials dispensed  
581 during the prior quarter. Given the strong seasonality of malaria in Ifanadiana, particularly its

582 exponential growth between the months of October - January, basing future needs on recent  
583 use can result in both under- and over-estimation of the quantities needed, depending on the  
584 season. While promising, the SMALLER MEWS was only able to predict stock needs within  
585 50 cases of reported needs less than 70% of the time. Health-seeking behaviors and stock  
586 requirements are determined by complex economic and behavioral processes that govern  
587 the health system, and therefore fluctuate greatly from month to month. Particularly at the  
588 hyper-local scale, relatively small stochastic events, such as a family-level outbreak or a  
589 several-day disruption of a transportation route, can drastically influence the number of  
590 cases seen at the health center that month. SMALLER MEWS was unable to capture these  
591 months with uncharacteristically high or low requirements for the season, particularly in more  
592 recent years during the COVID-19 pandemic, but predictions could be improved through the  
593 integration of more recent health system data to inform the back-calculation.

594         Limitations to the scaling-up of SMALLER are primarily related to data constraints.  
595 An ideal MEWS would be directly connected to an electronic HMIS, such as DHIS2 in the  
596 case of Madagascar and many other countries, to facilitate the timely incorporation of the  
597 most recent disease and stock data. However, HMIS data are often reported at the scale of  
598 the PHC catchment, which comprises dozens of villages across hundreds of square  
599 kilometers, and rarely at spatial scales relevant to local targeting by community health  
600 workers and mobile teams. Handwritten PHC registries were manually digitized to obtain the  
601 granular dataset needed to train the statistical model in the SMALLER MEWS, a resource-  
602 and time-intensive process that is not scalable at a national level for routine surveillance.  
603 However, the expansion of eHMIS systems and mobile technology such as commCare or  
604 DHIS2 tracker, which include information on patient residences, will make the integration of  
605 HMIS data into a national, highly granular MEWS more feasible in the future. Indeed, an  
606 electronic data collection program at PHCs was established in the district of Ifanadiana in  
607 October 2023, and will be integrated into a MEWS in the coming years as it expands to  
608 cover the entire district. Environmental data can also be limiting, not necessarily due to their  
609 availability but rather to the computational and technical resources required to access and  
610 process datasets at local scales (Wimberly et al. 2021). For example, a day of Sentinel-2  
611 imagery for the country of Madagascar contains over 60 images, each 500-700 MB in size.  
612 Downloading this volume of data would be difficult with limited internet connectivity and the  
613 treatment and processing of the images would require a high-processing computer, given  
614 their quantity and size. Services which process satellite imagery on a remote server, such as  
615 Google Earth Engine, AWS, or MOSAICS (Rolf et al. 2021), provide access to processed  
616 data without downloading the images themselves, but still require paid accounts and  
617 geospatial expertise to use. The on-going push for building disease forecasting capacity  
618 among public health actors and organizations will require further investment to make these



619 data available in regions with low connectivity and computational resources for a successful  
620 and timely integration into health information systems.

621

## 622 **CONCLUSIONS**

623 While recent advancements in data availability and statistical modeling have led to rapid  
624 growth in the development of MEWSs, few have been developed at the community scale  
625 required by certain public health interventions. We combined fine-resolution routine health  
626 data and environmental data from satellite imagery into a MEWS capable of generating  
627 predictions at a hyper-local scale. Cross-validation exercises revealed that the statistical  
628 model on which the MEWS was based had high predictive capacity across both space and  
629 time when applied to out-of-sample datasets. However, the SMALLER MEWS exhibited  
630 lower performance when predictions were used to estimate monthly medical stock  
631 requirements. This highlights a limitation of both the SMALLER MEWS and MEWSs in  
632 general regarding their ability to adequately account for the complex processes determining  
633 medical stock requirements and use. Future work should focus on how to integrate the  
634 already highly-predictive environmentally-driven MEWS into more complex models of health  
635 system functioning and processes to better understand and predict resource needs.

636

## 637 **DECLARATIONS**

638

### 639 ***Ethics Approval and Consent to Participate***

640 Use of aggregate monthly consultation counts from PHC registers for this study was  
641 authorized by the Madagascar National Ethics Committee and the Medical Inspector of  
642 Ifanadiana district. It was deemed non-human subjects research by Harvard University's  
643 Institutional Review Board. The IHOPE longitudinal survey implemented informed consent  
644 procedures approved by the Madagascar National Ethics Committee and the Madagascar  
645 Institute of Statistics. This included obtaining informed consent from all subjects or their legal  
646 guardians. Household-level de-identified data from the IHOPE survey were provided to the  
647 authors for the current study.

648

### 649 ***Consent for Publication***

650 Not Applicable

651

### 652 ***Availability of Data and Materials***

653 Data and code needed to reproduce these analyses can be found in a figshare repository  
654 (private link:<https://figshare.com/s/35bb8aecbf5191f8dbba>, public DOI to be shared upon  
655 publication). The web application's source code can be found at <https://gitlab.com/pivot-sci->

656 apps/smaller-backend and <https://gitlab.com/pivot-sci-apps/smaller-shiny>.

657

### 658 ***Competing Interests***

659 The authors declare that they have no competing interests.

660

### 661 ***Funding***

662 This work was supported by internal funding from Pivot, a grant from the Agence Nationale  
663 de la Recherche (Project ANR-19-CE36-0001–01), and the Wellcome Trust (Grant Num.  
664 226064/Z/22/Z).

665

### 666 ***Authors' Contributions***

667 MVE, MHB, BR, and AG conceptualized the study. MVE, FAI, MR, VH, CR, TC, ED, BR,  
668 EM, FAR, BR and AG contributed to designing the methodologies concerning data collection  
669 and analysis. MVE, FAI, MR, VH, CR, TC, ED, BR and AG collected the data and MVE, FAI,  
670 MR, VH, CR, TC, ED, BR, EM, FAR, BR, OR and AG conducted analyses and interpreted  
671 results. Project supervision was provided by FAI, VH, CR, MHB, BR, BR, OR and AG. The  
672 manuscript was drafted by MVE and AG and all authors contributed critically to the drafts  
673 and gave final approval for publication.

674

### 675 ***Acknowledgements***

676 We would like to thank the health professionals of Ifanadiana, who serve their patients while  
677 aiding in the collection of vital health data. We would like to acknowledge Ann Miller and the  
678 research team at INSTAT, who implement the IHOPE survey. This work would not be  
679 possible without the Pivot data collection team. We would also like to thank the Pivot clinical  
680 and programmatic teams for their feedback on this project and the Pivot IT team for their  
681 logistical support. We would also like to thank Thomas Germain, Pascal Mouquet, and the  
682 research group at SEAS-OI for deploying an automated Sen2Chain extraction workflow for  
683 our use.

684

## 685 REFERENCES

- Akulayi, L., A. Alum, A. Andrada, J. Archer, E. D. Arogundade, E. Auko, A. R. Badru, K. Bates, P. Bouanchaud, M. Bruce, K. Bruxvoort, P. Buyungo, A. Camilleri, E. D. Carter, S. Chapman, N. Charman, D. Chavasse, R. Cyr, K. Duff, G. Guedegbe, K. Esch, I. Evance, A. Fulton, H. Gataaka, T. Haslam, E. Harris, C. Hong, C. Hurley, W. Isenhower, E. Kaabunga, B. D. Kaaya, E. Kabui, B. Kangwana, L. Kapata, H. Kaula, G. Kigo, I. Kyomuhangi, A. Lailari, S. LeFevre, M. Littrell, G. Martin, D. Michael, E. Monroe, G. Mpanya, F. Mpasela, F. Mulama, A. Musuva, J. Ngigi, E. Ngoma, M. Norman, B. Nyauchi, K. A. O'Connell, C. Ochieng, E. Ogada, L. Ongwenyi, R. Orford, S. Phanalasy, S. Poyer, J. Rahariniaina, J. Raharinjatovo, L. Razafindralambo, S. Razakamiadana, C. Riley, J. Rodgers, A. Rusk, T. Shewchuk, S. Sensalire, J. Smith, P. Sochea, T. Solomon, R. Sudoi, M. E. Tassiba, K. Thanel, R. Thompson, M. Toda, C. Ujuju, M.-A. Valensi, V. Vasireddy, C. B. Whitman, C. Zinsou, K. Hanson, C. Goodman, and ACTwatch Group. 2017. Testing times: trends in availability, price, and market share of malaria diagnostics in the public and private healthcare sector across eight sub-Saharan African countries from 2009 to 2015. *Malaria Journal* 16:205.
- Arambepola, R., S. H. Keddie, E. L. Collins, K. A. Twohig, P. Amratia, A. Bertozzi-Villa, E. G. Chestnutt, J. Harris, J. Millar, J. Rozier, S. F. Rumisha, T. L. Symons, C. Vargas-Ruiz, M. Andriamananjara, S. Rabeherisoa, A. C. Ratsimbaoa, R. E. Howes, D. J. Weiss, P. W. Gething, and E. Cameron. 2020. Spatiotemporal mapping of malaria prevalence in Madagascar using routine surveillance and health survey data. *Scientific Reports* 10:18129.
- Arisco, N. J., B. L. Rice, L. M. Tantely, R. Girod, G. N. Emile, H. J. Randriamady, M. C. Castro, and C. D. Golden. 2020. Variation in Anopheles distribution and predictors of malaria infection risk across regions of Madagascar:13.
- Besag, J., J. York, and A. Mollié. 1991. Bayesian image restoration, with two applications in spatial statistics. *Annals of the Institute of Statistical Mathematics* 43:1–20.
- Bivand, R. 2023. rgrass: Interface Between “GRASS” Geographical Information System and

“R.”

Bousema, T., J. T. Griffin, R. W. Sauerwein, D. L. Smith, T. S. Churcher, W. Takken, A.

Ghani, C. Drakeley, and R. Gosling. 2012. Hitting Hotspots: Spatial Targeting of Malaria for Control and Elimination. *PLOS Medicine* 9:e1001165.

Bousema, T., G. Stresman, A. Y. Baidjoe, J. Bradley, P. Knight, W. Stone, V. Osofi, E.

Makori, C. Owaga, W. Odongo, P. China, S. Shagari, O. K. Doumbo, R. W.

Sauerwein, S. Kariuki, C. Drakeley, J. Stevenson, and J. Cox. 2016. The Impact of Hotspot-Targeted Interventions on Malaria Transmission in Rachuonyo South District in the Western Kenyan Highlands: A Cluster-Randomized Controlled Trial. *PLOS Medicine* 13:e1001993.

Challenger, J. D., B. P. Gonçalves, J. Bradley, K. Bruxvoort, A. B. Tiono, C. Drakeley, T.

Bousema, A. C. Ghani, and L. C. Okell. 2019. How delayed and non-adherent treatment contribute to onward transmission of malaria: a modelling study. *BMJ Global Health* 4:e001856.

Chamberlain, S., and D. Hocking. 2023. rnoaa: “NOAA” weather data from R.

Cohen, J. M., K. C. Ernst, K. A. Lindblade, J. M. Vulule, C. C. John, and M. L. Wilson. 2010.

Local topographic wetness indices predict household malaria risk better than land-use and land-cover in the western Kenya highlands. *Malaria Journal* 9:328.

Cordier, L. F., K. Kalaris, R. J. L. Rakotonanahary, L. Rakotonirina, J. Haruna, A. Mayfield,

L. Marovavy, M. G. McCarty, A. Tsirinomen’ny Aina, B. Ratsimbazafy, B. Razafinjato,

T. Loyd, F. Ihantamalala, A. Garchitorea, M. H. Bonds, and K. E. Finnegan. 2020.

Networks of Care in Rural Madagascar for Achieving Universal Health Coverage in Ifanadiana District. *Health Systems & Reform* 6:e1841437.

Dinku, T., R. Faniriantsoa, S. Islam, G. Nsengiyumva, and A. Grossi. 2022. The Climate

Data Tool: Enhancing Climate Services Across Africa. *Frontiers in Climate* 3.

Epstein, A., J. F. Namuganga, I. Nabende, E. V. Kanya, M. R. Kanya, G. Dorsey, H.

Sturrock, S. Bhatt, I. Rodríguez-Barraquer, and B. Greenhouse. 2023. Mapping malaria incidence using routine health facility surveillance data in Uganda. *BMJ global health* 8:e011137.

- Evans, M. V., T. Andréambeloston, M. Randriamihaja, F. Ihantamalala, L. Cordier, G. Cowley, K. Finnegan, F. Hanitriniaina, A. C. Miller, L. M. Ralantomalala, A. Randriamahaso, B. Razafinjato, E. Razanahanitriniaina, R. J. Rakotonanahary, I. J. Andriamiandra, M. H. Bonds, and A. Garchitorea. 2022, August 18. Geographic barriers to care persist at the community healthcare level: evidence from rural Madagascar. medRxiv.
- Evans, M. V., M. H. Bonds, L. F. Cordier, J. M. Drake, F. Ihantamalala, J. Haruna, A. C. Miller, C. C. Murdock, M. Randriamanambtsoa, E. M. Raza-Fanomezanjanahary, B. R. Razafinjato, and A. C. Garchitorea. 2021. Socio-demographic, not environmental, risk factors explain fine-scale spatial patterns of diarrhoeal disease in Ifanadiana, rural Madagascar. *Proceedings of the Royal Society B* 288:20202501.
- Evans, M. V., F. A. Ihantamalala, M. Randriamihaja, A. T. Aina, M. H. Bonds, K. E. Finnegan, R. J. L. Rakotonanahary, M. Raza-Fanomezanjanahary, B. Razafinjato, O. Raobela, S. H. Raholiarimanana, T. H. Randrianaivalona, and A. Garchitorea. 2023. Applying a zero-corrected, gravity model estimator reduces bias due to heterogeneity in healthcare utilization in community-scale, passive surveillance datasets of endemic diseases. *Scientific Reports* 13:21288.
- Gao, B. 1996. NDWI—A normalized difference water index for remote sensing of vegetation liquid water from space. *Remote Sensing of Environment* 58:257–266.
- Garchitorea, A., F. A. Ihantamalala, C. Révillion, L. F. Cordier, M. Randriamihaja, B. Razafinjato, F. H. Rafenoarivamalala, K. E. Finnegan, J. C. Andrianirinarison, J. Rakotonirina, V. Herbreteau, and M. H. Bonds. 2021. Geographic barriers to achieving universal health coverage: evidence from rural Madagascar. *Health Policy and Planning* 36:1659–1670.
- Giraud, T. 2022. osrm: Interface Between R and the OpenStreetMap-Based Routing Service OSRM. *Journal of Open Source Software* 7:4574.
- GRASS Development Team. 2019. Geographic Resources Analysis Support System (GRASS GIS) Software, Version 7.6. Open Source Geospatial Foundation.
- Hemingway, J., R. Shretta, T. N. C. Wells, D. Bell, A. A. Djimdé, N. Achee, and G. Qi. 2016.

- Tools and Strategies for Malaria Control and Elimination: What Do We Need to Achieve a Grand Convergence in Malaria? *PLOS Biology* 14:e1002380.
- Holst, C., F. Sukums, D. Radovanovic, B. Ngowi, J. Noll, and A. S. Winkler. 2020. Sub-Saharan Africa—the new breeding ground for global digital health. *The Lancet Digital Health* 2:e160–e162.
- Howes, R. E., S. A. Mioramalala, B. Ramiranirina, T. Franchard, A. J. Rakotorahalahy, D. Bisanzio, P. W. Gething, P. A. Zimmerman, and A. Ratsimbaoa. 2016. Contemporary epidemiological overview of malaria in Madagascar: operational utility of reported routine case data for malaria control planning. *Malaria Journal* 15:502.
- Huete, A. R., H. Q. Liu, K. Batchily, and W. van Leeuwen. 1997. A comparison of vegetation indices over a global set of TM images for EOS-MODIS. *Remote Sensing of Environment* 59:440–451.
- Hussain-Alkhateeb, L., T. Rivera Ramírez, A. Kroeger, E. Gozzer, and S. Runge-Ranzinger. 2021. Early warning systems (EWSs) for chikungunya, dengue, malaria, yellow fever, and Zika outbreaks: What is the evidence? A scoping review. *PLoS Neglected Tropical Diseases* 15:e0009686.
- Hyde, E., M. H. Bonds, F. A. Ihantamalala, A. C. Miller, L. F. Cordier, B. Razafinjato, H. Andriambolamanana, M. Randriamanambintsoa, M. Barry, J. C. Andrianirinarison, M. N. Andriamananjara, and A. Garchitorena. 2021. Estimating the local spatio-temporal distribution of malaria from routine health information systems in areas of low health care access and reporting. *International Journal of Health Geographics* 20:8.
- Ihantamalala, F. A., V. Herbreteau, C. Révillion, M. Randriamihaja, J. Commins, T. Andréambeloston, F. H. Rafenoarimalala, A. Randrianambinina, L. F. Cordier, M. H. Bonds, and A. Garchitorena. 2020. Improving geographical accessibility modeling for operational use by local health actors. *International Journal of Health Geographics* 19:27.
- Ihantamalala, F. A., F. M. J. Rakotoarimanana, T. Ramiadantsoa, J. M. Rakotondramanga, G. Pennober, F. Rakotomanana, S. Cauchemez, C. J. E. Metcalf, V. Herbreteau, and A. Wesolowski. 2018. Spatial and temporal dynamics of malaria in Madagascar.



Malaria Journal 17:58.

- Kangwana, B. B., J. Njogu, B. Wasunna, S. V. Kedenge, D. N. Memusi, C. A. Goodman, D. Zurovac, and R. W. Snow. 2009. Malaria drug shortages in Kenya: a major failure to provide access to effective treatment. *The American Journal of Tropical Medicine and Hygiene* 80:737–738.
- Kaul, R. B., M. V. Evans, C. C. Murdock, and J. M. Drake. 2018. Spatio-temporal spillover risk of yellow fever in Brazil. *Parasites & Vectors* 11:488.
- Khoury, M. J., M. F. Iademarco, and W. T. Riley. 2016. Precision Public Health for the Era of Precision Medicine. *American journal of preventive medicine* 50:398–401.
- Landau, W. M. 2021. The targets R package: a dynamic Make-like function-oriented pipeline toolkit for reproducibility and high-performance computing. *Journal of Open Source Software* 6:2959.
- Mikkelsen-Lopez, I., F. Tediosi, G. Abdallah, M. Njozi, B. Amuri, R. Khatib, F. Manzi, and D. de Savigny. 2013. Beyond antimalarial stock-outs: implications of health provider compliance on out-of-pocket expenditure during care-seeking for fever in South East Tanzania. *BMC Health Services Research* 13:444.
- Miller, A. C., A. Garchitorena, V. Rabeza, M. Randriamanambintsoa, H.-T. Rahaniraka Razanadrakato, L. Cordier, M. A. Ouenzar, M. B. Murray, D. R. Thomson, and M. H. Bonds. 2018. Cohort Profile: Ifanadiana Health Outcomes and Prosperity longitudinal Evaluation (IHOPE). *International Journal of Epidemiology* 47:1394–1395e.
- Miller, A. C., R. H. Ramananjato, A. Garchitorena, V. R. Rabeza, D. Gikic, A. Cripps, L. Cordier, H.-T. R. Razanadrakato, M. Randriamanambintsoa, L. Hall, M. Murray, F. S. Razanavololo, M. L. Rich, and M. H. Bonds. 2017. Baseline population health conditions ahead of a health system strengthening program in rural Madagascar. *Global Health Action* 10:1329961.
- Morris, M., K. Wheeler-Martin, D. Simpson, S. J. Mooney, A. Gelman, and C. DiMaggio. 2019. Bayesian hierarchical spatial models: Implementing the Besag York Mollié model in stan. *Spatial and Spatio-temporal Epidemiology* 31:100301.
- Mouquet, P., C. Alexandre, J. Rasolomamonjy, J. Rosa, T. Catry, C. Révillion, S.

- Rakotondraompiana, and G. Pennober. 2020. Sentinel-1 and Sentinel-2 time series processing chains for cyclone impact monitoring in southwest Indian ocean. The International Archives of the Photogrammetry, Remote Sensing and Spatial Information Sciences XLIII-B3-2020:1593–1599.
- Ngonghala, C. N., S. Y. Del Valle, R. Zhao, and J. Mohammed-Awel. 2014. Quantifying the impact of decay in bed-net efficacy on malaria transmission. *Journal of Theoretical Biology* 363:247–261.
- Nguyen, M., R. E. Howes, T. C. D. Lucas, K. E. Battle, E. Cameron, H. S. Gibson, J. Rozier, S. Keddie, E. Collins, R. Arambepola, S. Y. Kang, C. Hendriks, A. Nandi, S. F. Rumisha, S. Bhatt, S. A. Mioramalala, M. A. Nambinisoa, F. Rakotomanana, P. W. Gething, and D. J. Weiss. 2020. Mapping malaria seasonality in Madagascar using health facility data. *BMC Medicine* 18:26.
- Noor, A. M., D. Zurovac, S. I. Hay, S. A. Ochola, and R. W. Snow. 2003. Defining equity in physical access to clinical services using geographical information systems as part of malaria planning and monitoring in Kenya. *Tropical medicine & international health: TM & IH* 8:917–926.
- Ohr, C., K. W. Roberts, H. J. W. Sturrock, J. Wegbreit, B. Y. Lee, and R. D. Gosling. 2015. Information Systems to Support Surveillance for Malaria Elimination. *The American Journal of Tropical Medicine and Hygiene* 93:145–152.
- Ollivier, C. C., S. D. Carrière, T. Heath, A. Oliosio, Z. Rabefitia, H. Rakoto, L. Oudin, and F. Satgé. 2023. Ensemble precipitation estimates based on an assessment of 21 gridded precipitation datasets to improve precipitation estimations across Madagascar. *Journal of Hydrology: Regional Studies* 47:101400.
- Owoyemi, A., J. I. Osuchukwu, C. Azubuike, R. K. Ikpe, B. C. Nwachukwu, C. B. Akinde, G. W. Biokoro, A. B. Ajose, E. I. Nwokoma, N. E. Mfon, T. O. Benson, A. Ehimare, D. Irowa-Omoregie, and S. Olaniran. 2022. Digital Solutions for Community and Primary Health Workers: Lessons From Implementations in Africa. *Frontiers in Digital Health* 4.
- Perry, H. B., editor. 2020. Health for the people: National community health worker programs

from Afghanistan to Zimbabwe. USAID MCHIP.

Platt, A., A. A. Obala, C. MacIntyre, B. Otsyula, and W. P. O. Meara. 2018. Dynamic malaria hotspots in an open cohort in western Kenya. *Scientific Reports* 8:647.

Pons-Duran, C., M. Llach, S. Sanz, M. Ramírez, S. Méndez, E. Roman, M. Tholandi, F. Pagnoni, C. Menendez, and R. González. 2021. Community delivery of malaria intermittent preventive treatment in pregnancy: protocol of a quasi-experimental evaluation through multistage cluster sampling household surveys in four sub-Saharan African countries. *BMJ Open* 11:e044680.

Pourtois, J. D., K. Tallam, I. Jones, E. Hyde, A. J. Chamberlin, M. V. Evans, F. A. Ihantamalala, L. F. Cordier, B. R. Razafinjato, R. J. L. Rakotonanahary, A. T. Aina, P. Soloniaina, S. H. Raholiarimanana, C. Razafinjato, M. H. Bonds, G. A. D. Leo, S. H. Sokolow, and A. Garchitorena. 2023. Climatic, land-use and socio-economic factors can predict malaria dynamics at fine spatial scales relevant to local health actors: Evidence from rural Madagascar. *PLOS Global Public Health* 3:e0001607.

Rakotoarison, H. A., M. Rasamimalala, J. M. Rakotondramanga, B. Ramiranirina, T. Franchard, L. Kapesa, J. Razafindrakoto, H. Guis, L. M. Tantely, R. Girod, S. Rakotoniaina, L. Baril, P. Piola, and F. Rakotomanana. 2020. Remote Sensing and Multi-Criteria Evaluation for Malaria Risk Mapping to Support Indoor Residual Spraying Prioritization in the Central Highlands of Madagascar. *Remote Sensing* 12:1585.

Randriamaherijaona, S., J. Raharinjatovo, and S. Boyer. 2017. Durability monitoring of long-lasting insecticidal (mosquito) nets (LLINs) in Madagascar: physical integrity and insecticidal activity. *Parasites & Vectors* 10:564.

Ratovoson, R., A. Garchitorena, D. Kassie, J. A. Ravelonarivo, V. Andrianaranjaka, S. Razanatsiorimalala, A. Razafimandimby, F. Rakotomanana, L. Ohlstein, R. Mangahasimbola, S. A. N. Randrianirisoa, J. Razafindrakoto, C. M. Dentinger, J. Williamson, L. Kapesa, P. Piola, M. Randrianariveojosia, J. Thwing, L. C. Steinhardt, and L. Baril. 2022. Proactive community case management decreased malaria prevalence in rural Madagascar: results from a cluster randomized trial. *BMC*

Medicine 20:322.

- Razafinjato, B., L. Rakotonirina, L. F. Cordier, A. Rasoarivao, M. Andrianomenjanahary, L. Marovavy, F. Hanitriniaina, I. J. Andriamiandra, A. Mayfield, D. Palazuelos, G. Cowley, A. Ramarson, F. Ihantamalala, R. J. L. Rakotonanahary, A. C. Miller, A. Garchitorena, M. G. McCarty, M. H. Bonds, and K. E. Finnegan. 2024. Evaluation of a novel approach to community health care delivery in Ifanadiana District, Madagascar. *PLOS Global Public Health* 4:e0002888.
- Rice, B. L., C. D. Golden, H. J. Randriamady, A. A. N. A. Rakotomalala, M. A. Vonona, E. J. G. Anjaranirina, J. Hazen, M. C. Castro, C. J. E. Metcalf, and D. L. Hartl. 2021. Fine-scale variation in malaria prevalence across ecological regions in Madagascar: a cross-sectional study. *BMC Public Health* 21:1018.
- Rolf, E., J. Proctor, T. Carleton, I. Bolliger, V. Shankar, M. Ishihara, B. Recht, and S. Hsiang. 2021. A generalizable and accessible approach to machine learning with global satellite imagery. *Nature Communications* 12:4392.
- Rue, H., S. Martino, and N. Chopin. 2009. Approximate Bayesian inference for latent Gaussian models by using integrated nested Laplace approximations. *Journal of the Royal Statistical Society: Series B (Statistical Methodology)* 71:319–392.
- Ryan, S. J., C. A. Lippi, T. Caplan, A. Diaz, W. Dunbar, S. Grover, S. Johnson, R. Knowles, R. Lowe, B. A. Mateen, M. C. Thomson, and A. M. Stewart-Ibarra. 2023. The current landscape of software tools for the climate-sensitive infectious disease modelling community. *The Lancet Planetary Health* 7:e527–e536.
- Shiff, S., D. Helman, and I. M. Lensky. 2021. Worldwide continuous gap-filled MODIS land surface temperature dataset. *Scientific Data* 8:74.
- Stresman, G., T. Bousema, and J. Cook. 2019. Malaria Hotspots: Is There Epidemiological Evidence for Fine-Scale Spatial Targeting of Interventions? *Trends in Parasitology* 35:822–834.
- The PLoS Medicine Editors. 2009. Time for a “Third Wave” of Malaria Activism to Tackle the Drug Stock-out Crisis. *PLoS Medicine* 6:e1000188.
- USAID. 2023. Driving last-mile solutions to ensure access to public health commodities.

Wimberly, M. C., K. M. de Beurs, T. V. Loboda, and W. K. Pan. 2021. Satellite Observations and Malaria: New Opportunities for Research and Applications. *Trends in Parasitology* 37:525–537.

Wimberly, M. C., J. K. Davis, M. B. Hildreth, and J. L. Clayton. 2022. Integrated Forecasts Based on Public Health Surveillance and Meteorological Data Predict West Nile Virus in a High-Risk Region of North America. *Environmental Health Perspectives* 130:087006.

World Health Organization. 2021. Global technical strategy for malaria 2016–2030. 2021 update. World Health Organization, Geneva.

Xu, H. 2006. Modification of normalised difference water index (NDWI) to enhance open water features in remotely sensed imagery. *International Journal of Remote Sensing* 27:3025–3033.

Zinszer, K., A. D. Verma, K. Charland, T. F. Brewer, J. S. Brownstein, Z. Sun, and D. L. Buckeridge. 2012. A scoping review of malaria forecasting: past work and future directions. *BMJ Open* 2:e001992.
